# Supplementary material for: Basolateral amygdala Rims1 mediates adolescent social isolation-induced schizophrenia-like behaviors in mice
Source: Research Square preprint supplement (doi:10.21203/rs.3.rs-3844540/v1), 2024-02-05
Supplement: Supplementary file 1 [file f1bce4c4a907fe6ccd171558.xlsx]

## Sheet: catalog
Page	Item
1	Table S1. Descriptions of the studies and datasets used for MR analysis
2	Table S3. Main results, heterogeneity and pleiotropy test of the Mendelian randomization analysis
3	Table S4. Main results of Brain Rims1 expression on SCZ risk by Mendelian randomization analysis
4	Table S5. Main results of Brain Rims1 expression on SCZ risk by SMR
5	Table S6. Characteristics of selected SNPs for different trati pair
6	Table S7. Characteristics of selected SNPs inBrain Rims1 expression on SCZ risk
7	Supplementary FigureS1-S21. Scatter plot for the causal association by MR.

## Sheet: table S1
Table1. Descriptions of the studies and datasets used for MR analysis
Traits	Sample size	cases	control	Populaton	Consortium	Year	Sex
Exposure
Isolation, loneliness	455364	82436	372928	European	MRC-IEU	2018	Males and Females
Interval of family/friend visits	448858	-	-	European	MRC-IEU	2018	Males and Females
Able to confide	448858	-	-	European	MRC-IEU	2018	Males and Females
Outcome
Schizophrenia	77096	33640	43456	European	PGC	2014	Males and Females
Schizophrenia	127906	52017	75889	European	PGC	2022	Males and Females
Mania or irritability: I was easily distracted	114422	9162	105260	European	Neale lab	2018	Males and Females
Mania or irritability: I was more active than usual	114422	5688	108734	European	Neale lab	2018	Males and Females
Mania or irritability: I was more restless than usual	114422	12876	101546	European	Neale lab	2018	Males and Females
Anxiety disorders	187576	20992	166584	European	FinnGen	2021	Males and Females
Seen doctor for nerves/anxiety/tension/depression	459560	158565	300995	European	MRC-IEU	2018	Males and Females
Seen a psychiatrist for nerves/anxiety/tension/depression	460702	53414	407288	European	MRC-IEU	2018	Males and Females
Cognitive performance	257841	-	-	European	-	2018	Males and Females
Cognitive function	269867	-	-	European	-	2018	Males and Females
Fewer leisure/social activities	461369	140035	321334	European	MRC-IEU	2018	Males and Females
Diagnosed by a professional: Social anxiety/phobia	117716	1474	116242	European	Neale lab	2018	Males and Females
MR: Mendelian randomization; MRC-IEU: MRC Integrative Epidemiology Unit; PGC: Psychiatric Genomics Consortium

## Sheet: table S3
Table3. Main results, heterogeneity and pleiotropy test of the Mendelian randomization analysis
Outcome		Exposure		nSNPs	IVW		Cochrane's Q test		MR-Egger Intercept t		MR-PRESSO Global Test P
					OR (95% CI)	P	Q-value	P	Intercept	P
Schizophrenia
	Schizophrenia	Isolation, loneliness		10	15.9 (3.84 to 65.9)	0.000135488	7.04541	0.632391	0.0164447	0.357107	0.664
		Interval of family/friend visits		16	1.54 (1.07 to 2.21)	0.020608	14.1957	0.510744	-0.00556034	0.753152	0.488
		Able to confide		7	0.71 (0.51 to 1.00)	0.0468621	6.23921	0.396934	0.03503	0.269937	0.421
	Schizophrenia	Isolation, loneliness		11	15.8 (4.53 to 55.1)	1.49e-05	13.5126	0.196404	0.0295216	0.046889	0.222
		Interval of family/friend visits		17	1.60 (1.14 to 2.26)	0.00641198	23.2793	0.106471	-0.0048007	0.7681	0.117
		Able to confide		8	0.64 (0.46 to 0.88)	0.00671785	11.6274	0.113495	0.00378535	0.888332	0.149
Manic/hyper symptoms
	Mania or irritability: I was easily distracted	Isolation, loneliness		15	1.20 (1.05 to 1.37)	0.00683996	17.5082	0.230107	0.000391419	0.829674	0.263
		Interval of family/friend visits		19	0.99 (0.95 to 1.03)	0.624565	25.0322	0.124033	0.00185355	0.330991	0.128
		Able to confide		12	1.00 (0.97 to 1.03)	0.912187	16.1191	0.136768	0.00163761	0.523079	0.145
	Mania or irritability: I was more active than usual	Isolation, loneliness		15	1.11 (1.01 to 1.22)	0.0320157	10.361	0.735343	0.00158071	0.226113	0.737
		Interval of family/friend visits		20	1.00 (0.97 to 1.03)	0.837813	23.673	0.208997	0.00112355	0.43527	0.213
		Able to confide		12	0.98 (0.96 to 1.00)	0.0191205	6.21962	0.858316	0.000373228	0.812038	0.854
	Mania or irritability: I was more restless than usual	Isolation, loneliness		14	1.27 (1.09 to 1.49)	0.00278259	16.3133	0.232622	0.00337206	0.0960933	0.238
		Interval of family/friend visits		20	0.98 (0.93 to 1.02)	0.287418	23.9276	0.198945	0.0011029	0.600197	0.191
		Able to confide		11	0.96 (0.93 to 0.99)	0.00518526	9.65671	0.47111	0.000948847	0.700792	0.511
Anxiety
	Anxiety disorders	Isolation, loneliness		11	7.21 (1.61 to 32.4)	0.0098879	6.4005	0.780568	0.00821027	0.73656	0.799
		Interval of family/friend visits		16	0.86 (0.56 to 1.31)	0.478764	15.7428	0.399347	0.0239282	0.205801	0.412
		Able to confide		12	0.68 (0.50 to 0.92)	0.0127994	12.6807	0.314706	0.00471642	0.859912	0.313
	Seen doctor for nerves, anxiety, tension or depression	Isolation, loneliness		11	1.52 (1.30 to 1.77)	9.27e-08	17.0828	0.0725512	0.000497425	0.811887	0.133
		Interval of family/friend visits		13	0.97 (0.93 to 1.02)	0.228903	16.272	0.179095	0.00275437	0.210503	0.173
		Able to confide		12	0.96 (0.93 to 0.99)	0.00726057	19.0384	0.0604077	0.00101222	0.66006	0.076
	Seen a psychiatrist for nerves, anxiety, tension or depression	Isolation, loneliness		11	1.29 (1.16 to 1.45)	4.84e-06	19.2275	0.037466	0.000120421	0.936107	0.068
		Interval of family/friend visits		15	1.01 (0.99 to 1.04)	0.293362	12.5052	0.565803	0.000483832	0.644507	0.58
		Able to confide		10	0.97 (0.96 to 0.99)	0.0024841	10.4341	0.316496	0.00192393	0.196411	0.355
Cognition
	Cognitive performance	Isolation, loneliness		11	1.26 (0.66 to 2.40)	0.489918	32.81	0.000293154	0.0088244	0.325887	0.001
		Interval of family/friend visits		12	1.10 (0.92 to 1.31)	0.305886	14.9913	0.132379	0.00416197	0.684874	0.16
		Able to confide		9	1.05 (0.96 to 1.15)	0.29054	11.1923	0.191038	0.00161043	0.81194	0.219
	Cognitive function	Isolation, loneliness		9	0.48 (0.28 to 0.83)	0.0087171	16.3705	0.037374	0.00549388	0.420549	0.058
		Interval of family/friend visits		11	1.11 (0.96 to 1.30)	0.168739	17.7952	0.0585177	0.00770354	0.469169	0.073
		Able to confide		9	1.09 (1.00 to 1.18)	0.0419717	9.21397	0.324568	0.000142612	0.98138	0.341
social intereaction
	Fewer leisure/social activities	Isolation, loneliness		15	1.18 (1.06 to 1.31)	0.00186174	15.0928	0.37184	0.00132314	0.337858	0.392
		Interval of family/friend visits		18	1.07 (1.03 to 1.11)	0.000913596	27.032	0.0576008	0.000673158	0.713994	0.064
		Able to confide		13	0.97 (0.95 to 1.00)	0.0287295	18.3725	0.104839	0.0027736	0.155356	0.108
	Diagnosed by a professional: Social anxiety or social phobia	Isolation, loneliness		14	1.00 (0.95 to 1.06)	0.93831	17.5904	0.1737	0.00100858	0.160525	0.185
		Interval of family/friend visits		20	1.00 (0.98 to 1.01)	0.782481	22.2667	0.271185	5.34332e-06	0.993989	0.286
		Able to confide		13	0.99 (0.98 to 1.01)	0.42846	19.9307	0.0684079	0.00068139	0.498093	0.067

## Sheet: table S4
Table4. Main results of Brain Rims1 expression on SCZ risk by Mendelian randomization analysis
Exposure		SCZ-Outcome		nSNPs	IVW		Cochrane's Q test		MR-Egger Intercept t		MR-PRESSO Global Test P
					OR (95% CI)	P	Q-value	P	Intercept	P
Brainmeta_v2
	Rims1	ieu-b-42		5	0.94 (0.87 to 1.02)	0.0420528	1.27925	0.734067	-0.00473353	0.892439	0.914
		ieu-b-5102		5	0.93 (0.88 to 0.99)	0.0202976	6.00445	0.111394	0.00842397	0.830233	0.256
		finn-b-F5_SCHZPHR		5	0.93 (0.74 to 1.18)	0.571583	6.23921	0.396934	0.03503	0.859912	0.313
PsychENCODE
	Rims1	ieu-b-42		5	0.63 (0.49 to 0.81)	0.000295297	5.08402	0.165747	0.0154906	0.850107	0.382
		ieu-b-5102		5	0.70 (0.59 to 0.84)	0.000147753	3.5264	0.317354	0.0432862	0.449193	0.479
		finn-b-F5_SCHZPHR		4	0.36 (0.18 to 0.75)	0.00591468	1.31417	0.72577	-0.0464384	0.82466	0.724
metaBrain
	Rims1	ieu-b-42		8	0.96 (0.90 to 1.01)	0.0995163	2.11077	0.909234	-0.0302041	0.243053	0.852
		ieu-b-5102		8	0.94 (0.90 to 0.98)	0.00266398	2.96388	0.813367	-0.0187633	0.349025	0.777
		finn-b-F5_SCHZPHR		8	0.95 (0.78 to 1.17)	0.631619	3.96545	0.319852	0.00068139	0.337858	0.392
Brainmeta_v2-SCZ(ieu-b-42)
	id.exposure	id.outcome	outcome	exposure	method	nsnp	b	se	pval	lo_ci	up_ci	or	or_lci95	or_uci95
1	Rims1	ieu-b-42	schizophrenia || id:ieu-b-42	Rims1	MR Egger	5	-0.0391431	0.176826	0.83902	-0.385723	0.307436	0.961613	0.679959	1.35993
2	Rims1	ieu-b-42	schizophrenia || id:ieu-b-42	Rims1	Weighted median	5	-0.0603468	0.0386999	0.118913	-0.136199	0.0155051	0.941438	0.872669	1.01563
3	Rims1	ieu-b-42	schizophrenia || id:ieu-b-42	Rims1	Inverse variance weighted	5	-0.0647158	0.0318327	0.0420528	-0.127108	-0.0023237	0.937334	0.880639	0.997679
4	Rims1	ieu-b-42	schizophrenia || id:ieu-b-42	Rims1	Simple mode	5	-0.0595689	0.0495038	0.295199	-0.156596	0.0374586	0.942171	0.855049	1.03817
5	Rims1	ieu-b-42	schizophrenia || id:ieu-b-42	Rims1	Weighted mode	5	-0.0629969	0.0463938	0.246051	-0.153929	0.0279349	0.938946	0.857333	1.02833
Brainmeta_v2-SCZ(ieu-b-5102)
	id.exposure	id.outcome	outcome	exposure	method	nsnp	b	se	pval	lo_ci	up_ci	or	or_lci95	or_uci95
1	Rims1	ieu-b-5102	Schizophrenia || id:ieu-b-5102	Rims1	MR Egger	5	-0.117762	0.197752	0.59344	-0.505357	0.269832	0.888907	0.60329	1.30974
2	Rims1	ieu-b-5102	Schizophrenia || id:ieu-b-5102	Rims1	Weighted median	5	-0.087156	0.0330125	0.00828829	-0.15186	-0.0224516	0.916534	0.859108	0.977799
3	Rims1	ieu-b-5102	Schizophrenia || id:ieu-b-5102	Rims1	Inverse variance weighted	5	-0.072298	0.0311522	0.0202976	-0.133356	-0.0112397	0.930254	0.875153	0.988823
4	Rims1	ieu-b-5102	Schizophrenia || id:ieu-b-5102	Rims1	Simple mode	5	-0.097157	0.0475535	0.110552	-0.190362	-0.00395214	0.907413	0.82666	0.996056
5	Rims1	ieu-b-5102	Schizophrenia || id:ieu-b-5102	Rims1	Weighted mode	5	-0.097157	0.0373618	0.0600207	-0.170386	-0.0239278	0.907413	0.843339	0.976356
Brainmeta_v2-SCZ(finn-b-F5_SCHZPHR)
	id.exposure	id.outcome	outcome	exposure	method	nsnp	b	se	pval	lo_ci	up_ci	or	or_lci95	or_uci95
1	Rims1	finn-b-F5_SCHZPHR	Schizophrenia || id:finn-b-F5_SCHZPHR	Rims1	MR Egger	5	0.646309	0.69238	0.419441	-0.710756	2.00337	1.90848	0.491273	7.41404
2	Rims1	finn-b-F5_SCHZPHR	Schizophrenia || id:finn-b-F5_SCHZPHR	Rims1	Weighted median	5	-0.0593206	0.120463	0.622409	-0.295428	0.176786	0.942405	0.744213	1.19338
3	Rims1	finn-b-F5_SCHZPHR	Schizophrenia || id:finn-b-F5_SCHZPHR	Rims1	Inverse variance weighted	5	-0.0687781	0.121576	0.571583	-0.307067	0.169511	0.933534	0.735601	1.18473
4	Rims1	finn-b-F5_SCHZPHR	Schizophrenia || id:finn-b-F5_SCHZPHR	Rims1	Simple mode	5	0.10077	0.174639	0.594847	-0.241523	0.443062	1.10602	0.785431	1.55747
5	Rims1	finn-b-F5_SCHZPHR	Schizophrenia || id:finn-b-F5_SCHZPHR	Rims1	Weighted mode	5	-0.0442218	0.131867	0.754211	-0.302682	0.214238	0.956742	0.738834	1.23892
PsychENCODE-SCZ(ieu-b-42)
	id.exposure	id.outcome	outcome	exposure	method	nsnp	b	se	pval	lo_ci	up_ci	or	or_lci95	or_uci95
1	Rims1	ieu-b-42	schizophrenia || id:ieu-b-42	Rims1	MR Egger	5	-0.741967	1.39563	0.631828	-3.4774	1.99347	0.476177	0.0308875	7.34096
2	Rims1	ieu-b-42	schizophrenia || id:ieu-b-42	Rims1	Weighted median	5	-0.366764	0.154425	0.0175473	-0.669437	-0.0640916	0.692973	0.511997	0.937919
3	Rims1	ieu-b-42	schizophrenia || id:ieu-b-42	Rims1	Inverse variance weighted	5	-0.456262	0.126061	0.000295297	-0.703341	-0.209184	0.633648	0.494929	0.811246
4	Rims1	ieu-b-42	schizophrenia || id:ieu-b-42	Rims1	Simple mode	5	-0.297375	0.239774	0.282671	-0.767332	0.172582	0.742766	0.46425	1.18837
5	Rims1	ieu-b-42	schizophrenia || id:ieu-b-42	Rims1	Weighted mode	5	-0.276139	0.197178	0.233975	-0.662608	0.11033	0.758708	0.515505	1.11665
PsychENCODE-SCZ(ieu-b-5102)
	id.exposure	id.outcome	outcome	exposure	method	nsnp	b	se	pval	lo_ci	up_ci	or	or_lci95	or_uci95
1	Rims1	ieu-b-5102	Schizophrenia || id:ieu-b-5102	Rims1	MR Egger	5	-1.14912	0.924602	0.30222	-2.96134	0.663104	0.316917	0.0517497	1.94081
2	Rims1	ieu-b-5102	Schizophrenia || id:ieu-b-5102	Rims1	Weighted median	5	-0.307434	0.114664	0.00733672	-0.532176	-0.0826915	0.735332	0.587326	0.920635
3	Rims1	ieu-b-5102	Schizophrenia || id:ieu-b-5102	Rims1	Inverse variance weighted	5	-0.35072	0.0924209	0.000147753	-0.531865	-0.169575	0.704181	0.587508	0.844023
4	Rims1	ieu-b-5102	Schizophrenia || id:ieu-b-5102	Rims1	Simple mode	5	-0.291692	0.168151	0.157813	-0.621269	0.0378845	0.746998	0.537262	1.03861
5	Rims1	ieu-b-5102	Schizophrenia || id:ieu-b-5102	Rims1	Weighted mode	5	-0.291692	0.143783	0.112379	-0.573507	-0.00987734	0.746998	0.563546	0.990171
PsychENCODE-SCZ(finn-b-F5_SCHZPHR)
	id.exposure	id.outcome	outcome	exposure	method	nsnp	b	se	pval	lo_ci	up_ci	or	or_lci95	or_uci95
1	Rims1	finn-b-F5_SCHZPHR	Schizophrenia || id:finn-b-F5_SCHZPHR	Rims1	MR Egger	4	-0.140581	3.49991	0.971609	-7.00041	6.71925	0.868853	0.000911507	828.195
2	Rims1	finn-b-F5_SCHZPHR	Schizophrenia || id:finn-b-F5_SCHZPHR	Rims1	Weighted median	4	-0.935615	0.476286	0.0494838	-1.86913	-0.00209539	0.392344	0.154257	0.997907
3	Rims1	finn-b-F5_SCHZPHR	Schizophrenia || id:finn-b-F5_SCHZPHR	Rims1	Inverse variance weighted	4	-1.01718	0.36955	0.00591468	-1.74149	-0.292858	0.361615	0.175259	0.746128
4	Rims1	finn-b-F5_SCHZPHR	Schizophrenia || id:finn-b-F5_SCHZPHR	Rims1	Simple mode	4	-1.23614	0.62325	0.141592	-2.45771	-0.014571	0.290503	0.0856309	0.985535
5	Rims1	finn-b-F5_SCHZPHR	Schizophrenia || id:finn-b-F5_SCHZPHR	Rims1	Weighted mode	4	-0.738067	0.534794	0.26142	-1.78626	0.310129	0.478037	0.167585	1.3636
metaBrain-SCZ(ieu-b-42)
	id.exposure	id.outcome	outcome	exposure	method	nsnp	b	se	pval	lo_ci	up_ci	or	or_lci95	or_uci95
1	Rims1	ieu-b-42	schizophrenia || id:ieu-b-42	Rims1	MR Egger	8	0.144702	0.149884	0.371614	-0.14907	0.438474	1.15569	0.861509	1.55034
2	Rims1	ieu-b-42	schizophrenia || id:ieu-b-42	Rims1	Weighted median	8	-0.0445852	0.0346378	0.19803	-0.112475	0.0233049	0.956394	0.893619	1.02358
3	Rims1	ieu-b-42	schizophrenia || id:ieu-b-42	Rims1	Inverse variance weighted	8	-0.0459443	0.0278923	0.0995163	-0.100613	0.00872463	0.955095	0.904283	1.00876
4	Rims1	ieu-b-42	schizophrenia || id:ieu-b-42	Rims1	Simple mode	8	-0.0137559	0.0535107	0.804519	-0.118637	0.0911251	0.986338	0.88813	1.09541
5	Rims1	ieu-b-42	schizophrenia || id:ieu-b-42	Rims1	Weighted mode	8	-0.0359958	0.0478885	0.476763	-0.129857	0.0578656	0.964644	0.878221	1.05957
metaBrain-SCZ(ieu-b-5102)
	id.exposure	id.outcome	outcome	exposure	method	nsnp	b	se	pval	lo_ci	up_ci	or	or_lci95	or_uci95
1	Rims1	ieu-b-5102	Schizophrenia || id:ieu-b-5102	Rims1	MR Egger	8	0.0520183	0.118663	0.67646	-0.180561	0.284597	1.0534	0.834802	1.32923
2	Rims1	ieu-b-5102	Schizophrenia || id:ieu-b-5102	Rims1	Weighted median	8	-0.0557843	0.029077	0.0550477	-0.112775	0.00120671	0.945743	0.893351	1.00121
3	Rims1	ieu-b-5102	Schizophrenia || id:ieu-b-5102	Rims1	Inverse variance weighted	8	-0.0663833	0.0220978	0.00266398	-0.109695	-0.0230716	0.935772	0.896107	0.977193
4	Rims1	ieu-b-5102	Schizophrenia || id:ieu-b-5102	Rims1	Simple mode	8	-0.043572	0.0431857	0.346598	-0.128216	0.041072	0.957364	0.879663	1.04193
5	Rims1	ieu-b-5102	Schizophrenia || id:ieu-b-5102	Rims1	Weighted mode	8	-0.0474397	0.0420097	0.295998	-0.129779	0.0348994	0.953668	0.87829	1.03552
metaBrain-SCZ(finn-b-F5_SCHZPHR)
	id.exposure	id.outcome	outcome	exposure	method	nsnp	b	se	pval	lo_ci	up_ci	or	or_lci95	or_uci95
1	Rims1	finn-b-F5_SCHZPHR	Schizophrenia || id:finn-b-F5_SCHZPHR	Rims1	MR Egger	8	0.920269	0.456027	0.0901479	0.0264565	1.81408	2.50997	1.02681	6.13544
2	Rims1	finn-b-F5_SCHZPHR	Schizophrenia || id:finn-b-F5_SCHZPHR	Rims1	Weighted median	8	-0.0943327	0.114708	0.410866	-0.319161	0.130496	0.90998	0.726759	1.13939
3	Rims1	finn-b-F5_SCHZPHR	Schizophrenia || id:finn-b-F5_SCHZPHR	Rims1	Inverse variance weighted	8	-0.0499096	0.104098	0.631619	-0.253941	0.154122	0.951315	0.775737	1.16663
4	Rims1	finn-b-F5_SCHZPHR	Schizophrenia || id:finn-b-F5_SCHZPHR	Rims1	Simple mode	8	-0.0624555	0.191603	0.753981	-0.437998	0.313087	0.939455	0.645327	1.36764
5	Rims1	finn-b-F5_SCHZPHR	Schizophrenia || id:finn-b-F5_SCHZPHR	Rims1	Weighted mode	8	-0.0994396	0.153822	0.538591	-0.40093	0.202051	0.905345	0.669697	1.22391

## Sheet: table S5
Table5. Main results of Brain Rims1 expression on SCZ risk by SMR
Trait pair		probeID	ProbeChr	Gene	Probe bp	topSNP	topSNP chr	topSNP_bp	A1	A2	Freq	b GWAS	se GWAS	p GWAS	b eQTL	se eQTL	p eQTL	b SMR	se SMR	p SMR	p HEIDI	nsnp HEIDI
Brain_meta v2	ieu-b-5102	ENSG00000079841.18	6	RIMS1	72854626	rs12528750	6	72293746	G	A	0.522863	0.0239021	0.0086	0.00553503	-0.202464	0.0281146	5.95999e-13	-0.118056	0.0455304	0.00951685	0.0799126	40
psyencode	ieu-b-5102	ENSG00000079841	6	RIMS1	72596406	rs11751413	6	72315646	G	A	0.45825	-0.0183997	0.0086	0.0335699	0.0550553	0.0091961	2.14e-09	-0.334204	0.165882	0.0439348	0.168076	10
metabrain	ieu-b-5102	ENSG00000079841.18	6	RIMS1	71886703	rs11756168	6	71593298	G	A	0.454274	-0.0194987	0.0087	0.0242097	0.179142	0.0293524	1.04e-09	-0.108845	0.0517359	0.0353909	0.225825	39

## Sheet: table S6
Table6. Characteristics of selected SNPs for different trati pair
Trait pair	chr	pos	SNP	effect_allele	other_allele	beta.exposure	beta.outcome	eaf.exposure	eaf.outcome	pval.outcome	pval.exposure
Isolation, loneliness-SCZ	6	11959836	rs10456089	A	G	-0.00989449	-0.030305	0.078532	0.074	0.1982	2.1e-10
	7	12263587	rs10950394	T	C	0.00454673	0.016503	0.418938	0.409	0.136	2.19999e-08
	9	96360650	rs13291079	C	T	-0.00545834	-0.030102	0.4232	0.431	0.00640206	2.19989e-11
	5	103972357	rs30266	A	G	0.00496589	0.0244	0.328153	0.338	0.0352501	6.69993e-09
	18	53252388	rs599550	A	G	0.00851333	0.010099	0.848403	0.835	0.51	3.50026e-14
	17	66098154	rs62085660	G	C	-0.00535019	-0.018203	0.742071	0.745	0.1716	5.80003e-09
	2	148839547	rs6430286	A	G	-0.0046413	-0.002403	0.425264	0.474	0.8287	1.29999e-08
	11	47676170	rs7107356	G	A	0.00443587	0.012204	0.506669	0.487	0.2627	3.29997e-08
	2	212749786	rs74338595	C	T	-0.00518985	-0.016896	0.290797	0.313	0.1677	4.60002e-09
	9	77768122	rs773020	A	G	0.0077079	-0.011597	0.90015	0.876	0.5837	8.99995e-09
Isolation, loneliness-SCZ	6	11959836	rs10456089	A	G	-0.00989449	-0.0136958	0.078532	0.081	0.4455	2.1e-10
	7	12263587	rs10950394	T	C	0.00454673	0.0160989	0.418938	0.414	0.0660693	2.19999e-08
	9	96360650	rs13291079	C	T	-0.00545834	-0.0242047	0.4232	0.431	0.00581005	2.19989e-11
	5	103972357	rs30266	A	G	0.00496589	0.0260976	0.328153	0.323	0.00442996	6.69993e-09
	18	53252388	rs599550	A	G	0.00851333	0.002002	0.848403	0.854	0.8697	3.50026e-14
	17	66098154	rs62085660	G	C	-0.00535019	-0.0135971	0.742071	0.777	0.2126	5.80003e-09
	2	148839547	rs6430286	A	G	-0.0046413	-0.00720399	0.425264	0.443	0.4054	1.29999e-08
	11	47676170	rs7107356	G	A	0.00443587	0.00790113	0.506669	0.499	0.3607	3.29997e-08
	2	212749786	rs74338595	C	T	-0.00518985	-0.0250048	0.290797	0.295	0.0106199	4.60002e-09
	9	77768122	rs773020	A	G	0.0077079	-0.00370313	0.90015	0.9076	0.8222	8.99995e-09
	6	131186393	rs7770860	C	T	0.00480646	0.0275048	0.372568	0.383	0.00190502	7.49998e-09
Isolation, loneliness-more restless	20	47648856	rs1022688	A	G	0.00485298	0.00211799	0.329535	0.331875	0.128748	1.5e-08
	6	11959836	rs10456089	A	G	-0.00989449	0.00018472	0.078532	0.0794901	0.94183	2.1e-10
	7	12263587	rs10950394	T	C	0.00454673	0.00332331	0.418938	0.416075	0.0123897	2.19999e-08
	9	96360650	rs13291079	C	T	-0.00545834	-0.00176775	0.4232	0.427532	0.183105	2.19989e-11
	1	8476428	rs159960	G	A	-0.00445353	-0.00245997	0.556015	0.557548	0.0644466	4e-08
	9	120501644	rs2149351	G	T	-0.00522382	-0.000573632	0.757069	0.753805	0.706871	2.69998e-08
	5	103972357	rs30266	A	G	0.00496589	0.00330559	0.328153	0.328053	0.0182781	6.69993e-09
	18	53252388	rs599550	A	G	0.00851333	0.00216292	0.848403	0.846133	0.235295	3.50026e-14
	17	66097739	rs62085660	G	C	-0.00535019	-0.000101165	0.742071	0.744964	0.946617	5.80003e-09
	2	148834364	rs6430286	A	G	-0.0046413	-0.00198394	0.425264	0.421697	0.135934	1.29999e-08
	5	152204741	rs67988891	G	C	-0.00557771	-0.00233948	0.318885	0.320967	0.0969192	1.09999e-10
	3	82000680	rs7626596	A	G	-0.0047388	2.72456e-05	0.567	0.569086	0.98362	5.19996e-09
	9	77768122	rs773020	A	G	0.0077079	-0.00260158	0.90015	0.898918	0.232559	8.99995e-09
	6	131186393	rs7770860	C	T	0.00480646	-0.000679801	0.372568	0.372601	0.616629	7.49998e-09
Isolation, loneliness-easily distracted	20	47648856	rs1022688	A	G	0.00485298	0.000803012	0.329535	0.331875	0.500818	1.5e-08
	6	11959836	rs10456089	A	G	-0.00989449	-0.00308264	0.078532	0.0794901	0.15462	2.1e-10
	7	12263587	rs10950394	T	C	0.00454673	0.00254285	0.418938	0.416075	0.0253046	2.2e-08
	9	96360650	rs13291079	C	T	-0.00545834	-0.00202691	0.4232	0.427532	0.0743858	2.2e-11
	1	8476428	rs159960	G	A	-0.00445353	-0.000540824	0.556015	0.557548	0.634661	4e-08
	9	120501644	rs2149351	G	T	-0.00522382	-0.00293273	0.757069	0.753805	0.0246144	2.7e-08
	5	103972357	rs30266	A	G	0.00496589	0.00285009	0.328153	0.328053	0.017388	6.7e-09
	18	53252388	rs599550	A	G	0.00851333	-0.000283212	0.848403	0.846133	0.855858	3.5e-14
	17	66097739	rs62085660	G	C	-0.00535019	-0.000578044	0.742071	0.744964	0.654739	5.8e-09
	2	148834364	rs6430286	A	G	-0.0046413	-0.000309865	0.425264	0.421697	0.785451	1.3e-08
	5	152204741	rs67988891	G	C	-0.00557771	-0.000467951	0.318885	0.320967	0.697933	1.1e-10
	2	212749786	rs74338595	C	T	-0.00518985	-0.00164956	0.290797	0.290904	0.182185	4.6e-09
	3	82000680	rs7626596	A	G	-0.0047388	0.00169512	0.567	0.569086	0.135407	5.2e-09
	9	77768122	rs773020	A	G	0.0077079	0.000997623	0.90015	0.898918	0.592581	9e-09
	6	131186393	rs7770860	C	T	0.00480646	-0.000639228	0.372568	0.372601	0.582139	7.5e-09
Isolation, loneliness-more active	20	47648856	rs1022688	A	G	0.00485298	0.0006921	0.329535	0.331875	0.472733	1.5e-08
	6	11959836	rs10456089	A	G	-0.00989449	0.00106104	0.078532	0.0794901	0.544313	2.1e-10
	7	12263587	rs10950394	T	C	0.00454673	0.00106034	0.418938	0.416075	0.24841	2.2e-08
	9	96360650	rs13291079	C	T	-0.00545834	-0.000902062	0.4232	0.427532	0.325771	2.2e-11
	1	8476428	rs159960	G	A	-0.00445353	-0.000606715	0.556015	0.557548	0.509454	4e-08
	9	120501644	rs2149351	G	T	-0.00522382	-0.000344617	0.757069	0.753805	0.743812	2.7e-08
	5	103972357	rs30266	A	G	0.00496589	-0.000475379	0.328153	0.328053	0.623478	6.7e-09
	18	53252388	rs599550	A	G	0.00851333	0.000136947	0.848403	0.846133	0.91344	3.5e-14
	17	66097739	rs62085660	G	C	-0.00535019	-0.00210398	0.742071	0.744964	0.0439744	5.8e-09
	2	148834364	rs6430286	A	G	-0.0046413	-0.000722167	0.425264	0.421697	0.432372	1.3e-08
	5	152204741	rs67988891	G	C	-0.00557771	-0.000695177	0.318885	0.320967	0.475522	1.1e-10
	2	212749786	rs74338595	C	T	-0.00518985	-0.002399	0.290797	0.290904	0.0163493	4.6e-09
	3	82000680	rs7626596	A	G	-0.0047388	0.00016458	0.567	0.569086	0.857624	5.2e-09
	9	77768122	rs773020	A	G	0.0077079	-4.05e-05	0.90015	0.898918	0.978547	9e-09
	6	131186393	rs7770860	C	T	0.00480646	-3.73e-05	0.372568	0.372601	0.968263	7.5e-09
Isolation, loneliness-Anxiety disorders	20	47648856	rs1022688	A	G	0.00485298	0.011	0.329535	0.2732	0.4138	1.5e-08
	9	96360650	rs13291079	C	T	-0.00545834	-0.0145	0.4232	0.4463	0.2331	2.2e-11
	1	8476428	rs159960	G	A	-0.00445353	-0.0097	0.556015	0.6401	0.4427	4e-08
	9	120501644	rs2149351	G	T	-0.00522382	-0.0096	0.757069	0.8185	0.541499	2.7e-08
	18	53252388	rs599550	A	G	0.00851333	0.0062	0.848403	0.8693	0.7274	3.5e-14
	2	148834364	rs6430286	A	G	-0.0046413	-0.0004	0.425264	0.3865	0.9731	1.3e-08
	5	152204741	rs67988891	G	C	-0.00557771	-0.0252	0.318885	0.3305	0.0499195	1.1e-10
	11	47676170	rs7107356	G	A	0.00443587	0.0243	0.506669	0.4003	0.0493799	3.3e-08
	2	212749786	rs74338595	C	T	-0.00518985	-0.0067	0.290797	0.2642	0.627001	4.6e-09
	3	82000680	rs7626596	A	G	-0.0047388	0.0099	0.567	0.5867	0.4171	5.2e-09
	6	131186393	rs7770860	C	T	0.00480646	0.0136	0.372568	0.4671	0.2579	7.5e-09
Isolation, loneliness-Seen doctor for nerves/anxiety/tension/depression	20	47648856	rs1022688	A	G	0.00485298	0.00228771	0.329535	0.329379	0.0280001	1.5e-08
	6	11959836	rs10456089	A	G	-0.00989449	-0.0038337	0.078532	0.078433	0.0430002	2.1e-10
	9	96360650	rs13291079	C	T	-0.00545834	-0.00290843	0.4232	0.422921	0.00329997	2.19989e-11
	1	8476428	rs159960	G	A	-0.00445353	-0.00371814	0.556015	0.555881	0.00016	4e-08
	9	120501644	rs2149351	G	T	-0.00522382	-0.00406639	0.757069	0.756887	0.000369999	2.69998e-08
	18	53252388	rs599550	A	G	0.00851333	0.00543388	0.848403	0.848432	6.80002e-05	3.50026e-14
	17	66097739	rs62085660	G	C	-0.00535019	-0.000314688	0.742071	0.741939	0.780001	5.80003e-09
	5	152204741	rs67988891	G	C	-0.00557771	-0.000635735	0.318885	0.318934	0.54	1.09999e-10
	3	82000680	rs7626596	A	G	-0.0047388	-0.00141294	0.567	0.566999	0.15	5.19996e-09
	9	77768122	rs773020	A	G	0.0077079	0.00068235	0.90015	0.900215	0.68	8.99995e-09
	6	131186393	rs7770860	C	T	0.00480646	0.00168798	0.372568	0.372539	0.0949992	7.49998e-09
Isolation, loneliness-Seen a psychiatrist for nerves/anxiety/tension/depression	20	47648856	rs1022688	A	G	0.00485298	0.00111437	0.329535	0.329361	0.12	1.5e-08
	6	11959836	rs10456089	A	G	-0.00989449	-0.00245252	0.078532	0.078404	0.0580003	2.1e-10
	9	96360650	rs13291079	C	T	-0.00545834	-0.000992706	0.4232	0.423006	0.14	2.19989e-11
	1	8476428	rs159960	G	A	-0.00445353	-0.0024077	0.556015	0.555863	0.000350002	4e-08
	18	53252388	rs599550	A	G	0.00851333	0.00315282	0.848403	0.848414	0.000710003	3.50026e-14
	17	66097739	rs62085660	G	C	-0.00535019	-0.000924377	0.742071	0.741934	0.23	5.80003e-09
	2	148834364	rs6430286	A	G	-0.0046413	0.000365359	0.425264	0.425288	0.59	1.29999e-08
	5	152204741	rs67988891	G	C	-0.00557771	-0.000574932	0.318885	0.318881	0.42	1.09999e-10
	2	212749786	rs74338595	C	T	-0.00518985	-0.00322801	0.290797	0.290821	1.09999e-05	4.60002e-09
	9	77768122	rs773020	A	G	0.0077079	0.00124405	0.90015	0.900212	0.26	8.99995e-09
	6	131186393	rs7770860	C	T	0.00480646	0.00136917	0.372568	0.372592	0.0470002	7.49998e-09
Isolation, loneliness-Cognitive performance	6	11959836	rs10456089	A	G	-0.00989449	0.0076468	0.078532	NA	0.1906	2.1e-10
	7	12263587	rs10950394	T	C	0.00454673	0.00371376	0.418938	NA	0.18	2.19999e-08
	9	120501644	rs2149351	G	T	-0.00522382	0.00169528	0.757069	NA	0.6061	2.69998e-08
	5	103972357	rs30266	A	G	0.00496589	-0.00534894	0.328153	NA	0.0722104	6.69993e-09
	18	53252388	rs599550	A	G	0.00851333	-0.0122724	0.848403	NA	0.00265399	3.50026e-14
	2	148834364	rs6430286	A	G	-0.0046413	-0.000752471	0.425264	NA	0.787399	1.29999e-08
	2	212749786	rs74338595	C	T	-0.00518985	0.00773307	0.290797	NA	0.01027	4.60002e-09
	9	77768122	rs773020	A	G	0.0077079	-0.00145096	0.90015	NA	0.7727	8.99995e-09
	6	131186393	rs7770860	C	T	0.00480646	-0.00786601	0.372568	NA	0.00561604	7.49998e-09
Isolation, loneliness-Cognitive function	6	11959836	rs10456089	A	G	-0.00989449	0.00731	0.078532	0.07483	0.165	2.1e-10
	7	12263587	rs10950394	T	C	0.00454673	0.00458	0.418938	0.4184	0.113	2.19999e-08
	9	120501644	rs2149351	G	T	-0.00522382	0.00045	0.757069	0.7806	0.893	2.69998e-08
	5	103972357	rs30266	A	G	0.00496589	-0.00455	0.328153	0.3418	0.134	6.69993e-09
	17	66097739	rs62085660	G	C	-0.00535019	0.00173	0.742071	0.7296	0.599	5.80003e-09
	2	148834364	rs6430286	A	G	-0.0046413	-0.00046	0.425264	0.4303	0.874	1.29999e-08
	5	152204741	rs67988891	G	C	-0.00557771	-0.00754	0.318885	0.3061	0.0136	1.09999e-10
	11	47676170	rs7107356	G	A	0.00443587	0.00637	0.506669	0.5187	0.0253998	3.29997e-08
	2	212749786	rs74338595	C	T	-0.00518985	0.00814	0.290797	0.3401	0.00985009	4.60002e-09
	3	82000680	rs7626596	A	G	-0.0047388	-0.00843	0.567	0.5612	0.00334003	5.19996e-09
	9	77768122	rs773020	A	G	0.0077079	0.00488	0.90015	0.869	0.307	8.99995e-09
Isolation, loneliness- Fewer leisure/social activities	20	47648856	rs1022688	A	G	0.00485298	0.00026518	0.329535	0.329417	0.79	1.5e-08
	6	11959836	rs10456089	A	G	-0.00989449	0.000748724	0.078532	0.078418	0.69	2.1e-10
	7	12263587	rs10950394	T	C	0.00454673	0.00165139	0.418938	0.418859	0.0879995	2.19999e-08
	9	96360650	rs13291079	C	T	-0.00545834	-0.00206961	0.4232	0.422965	0.0329997	2.19989e-11
	1	8476428	rs159960	G	A	-0.00445353	0.000213331	0.556015	0.555875	0.83	4e-08
	9	120501644	rs2149351	G	T	-0.00522382	-0.00167638	0.757069	0.756976	0.13	2.69998e-08
	18	53252388	rs599550	A	G	0.00851333	0.000743899	0.848403	0.848423	0.58	3.50026e-14
	17	66097739	rs62085660	G	C	-0.00535019	-0.0011774	0.742071	0.741941	0.28	5.80003e-09
	2	148834364	rs6430286	A	G	-0.0046413	-0.00154835	0.425264	0.425303	0.11	1.29999e-08
	5	152204741	rs67988891	G	C	-0.00557771	-0.00261248	0.318885	0.318887	0.0109999	1.09999e-10
	11	47676170	rs7107356	G	A	0.00443587	-0.000632292	0.506669	0.506762	0.51	3.29997e-08
	2	212749786	rs74338595	C	T	-0.00518985	-2.07338e-05	0.290797	0.290856	0.98	4.60002e-09
	3	82000680	rs7626596	A	G	-0.0047388	-0.00207918	0.567	0.566952	0.0309999	5.19996e-09
	9	77768122	rs773020	A	G	0.0077079	-7.49989e-05	0.90015	0.900246	0.96	8.99995e-09
	6	131186393	rs7770860	C	T	0.00480646	9.23063e-05	0.372568	0.372604	0.93	7.49998e-09
Isolation, loneliness- Social anxiety/phobia	20	47648856	rs1022688	A	G	0.00485298	-0.000230907	0.329535	0.332062	0.634344	1.5e-08
	6	11959836	rs10456089	A	G	-0.00989449	0.00105213	0.078532	0.079401	0.232906	2.1e-10
	7	12263587	rs10950394	T	C	0.00454673	0.000726828	0.418938	0.415992	0.116422	2.19999e-08
	1	8476428	rs159960	G	A	-0.00445353	1.15758e-05	0.556015	0.557453	0.980065	4e-08
	9	120501644	rs2149351	G	T	-0.00522382	0.000784815	0.757069	0.754179	0.139686	2.69998e-08
	5	103972357	rs30266	A	G	0.00496589	-9.17872e-05	0.328153	0.328213	0.850677	6.69993e-09
	18	53252388	rs599550	A	G	0.00851333	-0.000774107	0.848403	0.846408	0.222694	3.50026e-14
	17	66097739	rs62085660	G	C	-0.00535019	-0.000980574	0.742071	0.744485	0.0622501	5.80003e-09
	2	148834364	rs6430286	A	G	-0.0046413	-0.000659735	0.425264	0.421944	0.154417	1.29999e-08
	5	152204741	rs67988891	G	C	-0.00557771	0.000360511	0.318885	0.32091	0.462533	1.09999e-10
	11	47676170	rs7107356	G	A	0.00443587	0.000411402	0.506669	0.508676	0.368967	3.29997e-08
	3	82000680	rs7626596	A	G	-0.0047388	0.000543867	0.567	0.569048	0.239295	5.19996e-09
	9	77768122	rs773020	A	G	0.0077079	0.000733985	0.90015	0.898956	0.333434	8.99995e-09
	6	131186393	rs7770860	C	T	0.00480646	0.000368781	0.372568	0.372442	0.435465	7.49998e-09
Interval of family/friend visits-SCZ	5	125370834	rs11746120	G	T	-0.0312256	0.012204	0.808484	0.786	0.3706	4.79999e-10
	2	60146915	rs1477503	T	C	-0.0232906	0.011296	0.536742	0.562	0.2992	4.20001e-09
	13	108140053	rs1830755	A	G	0.0244743	0.018596	0.701522	0.724	0.12	1.6e-08
	18	53252388	rs599550	A	G	-0.035542	0.010099	0.84831	0.835	0.51	1.09999e-10
	3	80738930	rs78802615	G	A	-0.0437828	0.027505	0.074852	0.069	0.2221	1.7e-08
	11	57733759	rs7926878	C	T	-0.0320199	0.019295	0.284864	0.292	0.1027	2.49977e-13
	11	131933385	rs80173267	C	A	-0.0315082	0.0185	0.163193	0.14	0.2212	3.59998e-09
Interval of family/friend visits-SCZ	5	125370834	rs11746120	G	T	-0.0312256	0.0138049	0.808484	0.803	0.2014	4.79999e-10
	2	60146915	rs1477503	T	C	-0.0232906	0.0154995	0.536742	0.545	0.0738499	4.20001e-09
	13	108140053	rs1830755	A	G	0.0244743	0.0144032	0.701522	0.709	0.128	1.6e-08
	11	13331226	rs4757144	A	G	0.0219335	-0.0177024	0.590398	0.578	0.0420698	4.60002e-08
	18	53252388	rs599550	A	G	-0.035542	0.002002	0.84831	0.854	0.8697	1.09999e-10
	3	80738930	rs78802615	G	A	-0.0437828	0.0258	0.074852	0.073	0.1601	1.7e-08
	11	57733759	rs7926878	C	T	-0.0320199	0.0268985	0.284864	0.29	0.00432404	2.49977e-13
	11	131933385	rs80173267	C	A	-0.0315082	0.0186019	0.163193	0.153	0.1221	3.59998e-09
Interval of family/friend visits-more restless	9	96341357	rs10992790	T	C	0.0305561	-0.0014285	0.341889	0.345506	0.302483	2.70023e-13
	16	71635836	rs11641811	A	C	0.0243932	0.000297167	0.522625	0.525068	0.821106	6.49995e-10
	5	125370834	rs11746120	G	T	-0.0312256	0.00303397	0.808484	0.809262	0.069528	4.79999e-10
	2	60146915	rs1477503	T	C	-0.0232906	0.000818812	0.536742	0.537129	0.534644	4.20001e-09
	13	108140053	rs1830755	A	G	0.0244743	-0.00169775	0.701522	0.702708	0.23811	1.6e-08
	20	48059241	rs35854893	T	C	-0.0478423	0.00419462	0.056852	0.0574615	0.13735	2.1e-08
	5	152260682	rs4533947	A	G	-0.0230719	0.00259011	0.632672	0.630523	0.0573205	1.79999e-08
	18	53252388	rs599550	A	G	-0.035542	0.00216292	0.84831	0.846133	0.235295	1.09999e-10
	3	80738930	rs78802615	G	A	-0.0437828	0.00372757	0.074852	0.0751245	0.147157	1.7e-08
	11	57733759	rs7926878	C	T	-0.0320199	0.000534475	0.284864	0.282433	0.713512	2.49977e-13
	11	131933385	rs80173267	C	A	-0.0315082	-0.00239713	0.163193	0.16437	0.177451	3.59998e-09
Interval of family/friend visits-easily distracted	9	96341357	rs10992790	T	C	0.0305561	-0.00202307	0.341889	0.345506	0.0878335	2.70023e-13
	16	71635836	rs11641811	A	C	0.0243932	0.00221937	0.522625	0.525068	0.0483793	6.49995e-10
	5	125370834	rs11746120	G	T	-0.0312256	0.00100099	0.808484	0.809262	0.483965	4.79999e-10
	2	60146915	rs1477503	T	C	-0.0232906	0.0013337	0.536742	0.537129	0.237123	4.20001e-09
	13	108140053	rs1830755	A	G	0.0244743	0.000933106	0.701522	0.702708	0.448511	1.6e-08
	20	48059241	rs35854893	T	C	-0.0478423	0.00210968	0.056852	0.0574615	0.382417	2.1e-08
	14	30066976	rs3783299	T	A	-0.0294415	-0.00114493	0.375459	0.374244	0.324484	5.50047e-13
	5	152260682	rs4533947	A	G	-0.0230719	0.000935162	0.632672	0.630523	0.422429	1.79999e-08
	18	53252388	rs599550	A	G	-0.035542	-0.000283212	0.84831	0.846133	0.855858	1.09999e-10
	3	80738930	rs78802615	G	A	-0.0437828	0.00170218	0.074852	0.0751245	0.439063	1.7e-08
	11	57733759	rs7926878	C	T	-0.0320199	0.000261591	0.284864	0.282433	0.833635	2.49977e-13
	11	131933385	rs80173267	C	A	-0.0315082	-0.00296855	0.163193	0.16437	0.050912	3.59998e-09
Interval of family/friend visits-more active	9	96341357	rs10992790	T	C	0.0305561	-0.00210624	0.341889	0.345506	0.0278612	2.70023e-13
	5	125370834	rs11746120	G	T	-0.0312256	-0.000427431	0.808484	0.809262	0.711477	4.79999e-10
	2	60146915	rs1477503	T	C	-0.0232906	-0.000441329	0.536742	0.537129	0.6283	4.20001e-09
	13	108140053	rs1830755	A	G	0.0244743	-0.000276629	0.701522	0.702708	0.780969	1.6e-08
	20	48059241	rs35854893	T	C	-0.0478423	0.00245602	0.056852	0.0574615	0.208256	2.1e-08
	14	30066976	rs3783299	T	A	-0.0294415	0.000355092	0.375459	0.374244	0.705308	5.50047e-13
	5	152260682	rs4533947	A	G	-0.0230719	0.00121879	0.632672	0.630523	0.19571	1.79999e-08
	11	13331226	rs4757144	A	G	0.0219335	-0.00107802	0.590398	0.593338	0.244172	4.60002e-08
	18	53252388	rs599550	A	G	-0.035542	0.000136947	0.84831	0.846133	0.91344	1.09999e-10
	3	80738930	rs78802615	G	A	-0.0437828	0.00142774	0.074852	0.0751245	0.421868	1.7e-08
	11	57733759	rs7926878	C	T	-0.0320199	0.000874295	0.284864	0.282433	0.384981	2.49977e-13
	11	131933385	rs80173267	C	A	-0.0315082	0.000621888	0.163193	0.16437	0.612776	3.59998e-09
Interval of family/friend visits-Anxiety disorders	9	96341357	rs10992790	T	C	0.0305561	-0.0241	0.341889	0.3762	0.0528798	2.70023e-13
	16	71635836	rs11641811	A	C	0.0243932	0.0146	0.522625	0.5898	0.2359	6.49995e-10
	5	125370834	rs11746120	G	T	-0.0312256	-0.0116	0.808484	0.7791	0.4238	4.79999e-10
	2	60146915	rs1477503	T	C	-0.0232906	0.0285	0.536742	0.6639	0.0257798	4.20001e-09
	13	108140053	rs1830755	A	G	0.0244743	-0.0035	0.701522	0.7115	0.7938	1.6e-08
	20	48059241	rs35854893	T	C	-0.0478423	0.018	0.056852	0.03438	0.587899	2.1e-08
	14	30066976	rs3783299	T	A	-0.0294415	0.0195	0.375459	0.3898	0.1148	5.50047e-13
	5	152260682	rs4533947	A	G	-0.0230719	0.0243	0.632672	0.6059	0.0485903	1.79999e-08
	11	13331226	rs4757144	A	G	0.0219335	-0.0017	0.590398	0.5085	0.8898	4.60002e-08
	18	53252388	rs599550	A	G	-0.035542	0.0062	0.84831	0.8693	0.7274	1.09999e-10
	11	57733759	rs7926878	C	T	-0.0320199	0.0184	0.284864	0.2749	0.1736	2.49977e-13
	11	131933385	rs80173267	C	A	-0.0315082	0.0102	0.163193	0.1218	0.5813	3.59998e-09
Interval of family/friend visits-Seen doctor for nerves/anxiety/tension/depression	9	96341357	rs10992790	T	C	0.0305561	-0.00384161	0.341889	0.341731	0.0002	2.70023e-13
	16	71635836	rs11641811	A	C	0.0243932	0.000348999	0.522625	0.522468	0.719999	6.49995e-10
	5	125370834	rs11746120	G	T	-0.0312256	0.000743419	0.808484	0.808536	0.55	4.79999e-10
	2	60146915	rs1477503	T	C	-0.0232906	0.0019731	0.536742	0.5369	0.0439997	4.20001e-09
	13	108140053	rs1830755	A	G	0.0244743	0.00131588	0.701522	0.701552	0.22	1.6e-08
	20	48059241	rs35854893	T	C	-0.0478423	0.00446388	0.056852	0.056808	0.0350002	2.1e-08
	14	30066976	rs3783299	T	A	-0.0294415	0.00159433	0.375459	0.37536	0.11	5.50047e-13
	5	152260682	rs4533947	A	G	-0.0230719	0.000641621	0.632672	0.632805	0.53	1.79999e-08
	11	13331226	rs4757144	A	G	0.0219335	-0.0012342	0.590398	0.590295	0.21	4.60002e-08
	3	80738930	rs78802615	G	A	-0.0437828	-0.000906779	0.074852	0.074821	0.64	1.7e-08
	11	57733759	rs7926878	C	T	-0.0320199	0.0017264	0.284864	0.284841	0.11	2.49977e-13
	11	131933385	rs80173267	C	A	-0.0315082	-4.79422e-05	0.163193	0.163278	0.97	3.59998e-09
Interval of family/friend visits-Seen a psychiatrist for nerves/anxiety/tension/depression	9	96341357	rs10992790	T	C	0.0305561	-0.00125754	0.341889	0.341732	0.0749998	2.70023e-13
	16	71635836	rs11641811	A	C	0.0243932	0.0002513	0.522625	0.522379	0.709999	6.49995e-10
	5	125370834	rs11746120	G	T	-0.0312256	0.00116011	0.808484	0.80854	0.17	4.79999e-10
	13	108140053	rs1830755	A	G	0.0244743	0.000707131	0.701522	0.701638	0.33	1.6e-08
	20	48059241	rs35854893	T	C	-0.0478423	0.00313637	0.056852	0.0568	0.0299999	2.1e-08
	14	30066976	rs3783299	T	A	-0.0294415	0.00155285	0.375459	0.375382	0.0239999	5.50047e-13
	5	152260682	rs4533947	A	G	-0.0230719	0.000634066	0.632672	0.632845	0.36	1.79999e-08
	3	80738930	rs78802615	G	A	-0.0437828	-0.000148812	0.074852	0.074842	0.91	1.7e-08
	11	57733759	rs7926878	C	T	-0.0320199	0.00144178	0.284864	0.284905	0.051	2.49977e-13
	11	131933385	rs80173267	C	A	-0.0315082	0.000608069	0.163193	0.163239	0.5	3.59998e-09
Interval of family/friend visits-Cognitive performance	5	125370834	rs11746120	G	T	-0.0312256	-0.00207025	0.808484	NA	0.5284	4.79999e-10
	2	60146915	rs1477503	T	C	-0.0232906	-0.00370118	0.536742	NA	0.176	4.20001e-09
	13	108140053	rs1830755	A	G	0.0244743	-0.00226964	0.701522	NA	0.4439	1.6e-08
	20	48059241	rs35854893	T	C	-0.0478423	0.00152077	0.056852	NA	0.8104	2.1e-08
	11	13331226	rs4757144	A	G	0.0219335	0.00237285	0.590398	NA	0.3887	4.60002e-08
	18	53252388	rs599550	A	G	-0.035542	-0.0122724	0.84831	NA	0.00265399	1.09999e-10
	3	80738930	rs78802615	G	A	-0.0437828	-0.000492327	0.074852	NA	0.9332	1.7e-08
	11	57733759	rs7926878	C	T	-0.0320199	-0.00352256	0.284864	NA	0.2518	2.49977e-13
	11	131933385	rs80173267	C	A	-0.0315082	-0.00044789	0.163193	NA	0.9099	3.59998e-09
Interval of family/friend visits-Cognitive function	5	125370834	rs11746120	G	T	-0.0312256	-0.0008	0.808484	0.7976	0.824	4.79999e-10
	2	60146915	rs1477503	T	C	-0.0232906	-0.00497	0.536742	0.5017	0.0820994	4.20001e-09
	13	108140053	rs1830755	A	G	0.0244743	-0.00432	0.701522	0.6905	0.167	1.6e-08
	20	48059241	rs35854893	T	C	-0.0478423	-0.00033	0.056852	0.04252	0.957	2.1e-08
	11	13331226	rs4757144	A	G	0.0219335	-0.00021	0.590398	0.6037	0.943	4.60002e-08
	18	53252388	rs599550	A	G	-0.035542	-0.0107	0.84831	0.8503	0.00711001	1.09999e-10
	3	80738930	rs78802615	G	A	-0.0437828	0.00064	0.074852	0.08333	0.905	1.7e-08
	11	57733759	rs7926878	C	T	-0.0320199	-0.00197	0.284864	0.301	0.533	2.49977e-13
	11	131933385	rs80173267	C	A	-0.0315082	0.0014	0.163193	0.1497	0.717999	3.59998e-09
Interval of family/friend visits-Fewer leisure/social activities	9	96341357	rs10992790	T	C	0.0305561	-0.00126802	0.341889	0.341755	0.21	2.70023e-13
	16	71635836	rs11641811	A	C	0.0243932	-0.000732771	0.522625	0.522431	0.44	6.49995e-10
	5	125370834	rs11746120	G	T	-0.0312256	-0.000240202	0.808484	0.808497	0.84	4.79999e-10
	2	60146915	rs1477503	T	C	-0.0232906	0.00361888	0.536742	0.536905	0.00017	4.20001e-09
	13	108140053	rs1830755	A	G	0.0244743	-6.7001e-06	0.701522	0.701591	0.99	1.6e-08
	20	48059241	rs35854893	T	C	-0.0478423	-0.000630318	0.056852	0.056839	0.760001	2.1e-08
	14	30066976	rs3783299	T	A	-0.0294415	0.00011818	0.375459	0.37537	0.9	5.50047e-13
	5	152260682	rs4533947	A	G	-0.0230719	0.00110684	0.632672	0.63284	0.27	1.79999e-08
	11	13331226	rs4757144	A	G	0.0219335	-4.92794e-05	0.590398	0.590295	0.96	4.60002e-08
	18	53252388	rs599550	A	G	-0.035542	0.000743899	0.84831	0.848423	0.58	1.09999e-10
	3	80738930	rs78802615	G	A	-0.0437828	-0.00183106	0.074852	0.074846	0.33	1.7e-08
	11	57733759	rs7926878	C	T	-0.0320199	0.00266376	0.284864	0.284927	0.012	2.49977e-13
	11	131933385	rs80173267	C	A	-0.0315082	0.000816404	0.163193	0.163272	0.53	3.59998e-09
Interval of family/friend visits-Social anxiety/phobia	9	96341357	rs10992790	T	C	0.0305561	-0.00111551	0.341889	0.345115	0.0207807	2.70023e-13
	16	71635836	rs11641811	A	C	0.0243932	0.000382083	0.522625	0.524904	0.403707	6.49995e-10
	5	125370834	rs11746120	G	T	-0.0312256	-0.000257503	0.808484	0.809328	0.658065	4.79999e-10
	2	60146915	rs1477503	T	C	-0.0232906	7.56661e-05	0.536742	0.537069	0.869056	4.20001e-09
	13	108140053	rs1830755	A	G	0.0244743	1.00728e-06	0.701522	0.702804	0.998396	1.6e-08
	20	48059241	rs35854893	T	C	-0.0478423	-0.00177531	0.056852	0.0573704	0.0711934	2.1e-08
	14	30066976	rs3783299	T	A	-0.0294415	0.000879358	0.375459	0.373954	0.0629535	5.50047e-13
	5	152260682	rs4533947	A	G	-0.0230719	-0.000346008	0.632672	0.630603	0.465823	1.79999e-08
	11	13331226	rs4757144	A	G	0.0219335	-0.000729017	0.590398	0.593164	0.117758	4.60002e-08
	18	53252388	rs599550	A	G	-0.035542	-0.000774107	0.84831	0.846408	0.222694	1.09999e-10
	3	80738930	rs78802615	G	A	-0.0437828	0.000223833	0.074852	0.0752379	0.802515	1.7e-08
	11	57733759	rs7926878	C	T	-0.0320199	0.000932319	0.284864	0.282368	0.0659553	2.49977e-13
	11	131933385	rs80173267	C	A	-0.0315082	-0.000179271	0.163193	0.164529	0.771983	3.59998e-09
Able to confide-SCZ	1	93639596	rs12044657	C	T	0.0144417	-0.004301	0.650321	0.667	0.702999	2.5e-09
	18	63489661	rs12326476	C	T	0.0161769	0.0078	0.277914	0.263	0.5321	4.09996e-10
	5	30831387	rs1392446	T	C	-0.0129809	-0.010505	0.552163	0.534	0.3346	2.59998e-08
	5	26913774	rs17563464	A	C	-0.0156366	-0.008799	0.223308	0.179	0.5456	3.09999e-08
	19	30951753	rs17614190	T	C	0.0294542	0.008702	0.064948	0.07	0.7002	5.19996e-10
	6	98297832	rs1933720	C	T	0.018566	0.010596	0.366054	0.391	0.3539	1.69981e-14
	8	65254903	rs2008156	C	T	-0.0193147	0.003596	0.192329	0.194	0.7977	5.10035e-11
	5	164618886	rs2052511	T	C	-0.0132005	0.002696	0.622169	0.603	0.8076	3.50002e-08
	13	60484175	rs2151502	A	G	-0.0162431	0.006698	0.749095	0.768	0.5943	1.29999e-09
	5	106450985	rs2410941	A	C	0.0132639	0.006201	0.527837	0.524	0.569101	1e-08
	8	116645056	rs2737226	C	T	0.0172124	0.026398	0.607741	0.621	0.02006	4.30031e-13
	20	47543634	rs35393280	C	A	0.0217001	0.025697	0.246454	0.21	0.0410299	6.29941e-16
	3	35780735	rs35497369	C	T	-0.0159154	-0.020498	0.283206	0.284	0.0889099	7.19996e-10
	3	81698481	rs3772912	G	A	-0.016537	0.009596	0.362794	0.356	0.3929	6.4003e-12
	17	66019926	rs62086906	C	T	0.0157891	0.021295	0.210148	0.224	0.1196	2.80001e-08
	1	72819888	rs74967575	A	T	-0.0191423	0.0089	0.176304	0.174	0.5307	2.99999e-10
Able to confide-SCZ	1	93639596	rs12044657	C	T	0.0144417	-0.0160013	0.650321	0.657	0.0779902	2.5e-09
	18	63489661	rs12326476	C	T	0.0161769	0.00290421	0.277914	0.258	0.7734	4.1e-10
	5	30831387	rs1392446	T	C	-0.0129809	-0.0111971	0.552163	0.542	0.1947	2.6e-08
	5	26913774	rs17563464	A	C	-0.0156366	-0.00529595	0.223308	0.206	0.6463	3.1e-08
	19	30951753	rs17614190	T	C	0.0294542	0.0101008	0.064948	0.064	0.5712	5.2e-10
	6	98297832	rs1933720	C	T	0.018566	0.015002	0.366054	0.358	0.0986893	1.7e-14
	8	65254903	rs2008156	C	T	-0.0193147	-0.00459941	0.192329	0.188	0.674899	5.1e-11
	5	164618886	rs2052511	T	C	-0.0132005	0.00619918	0.622169	0.626	0.4891	3.5e-08
	13	60484175	rs2151502	A	G	-0.0162431	-0.00529595	0.749095	0.751	0.592199	1.3e-09
	5	106450985	rs2410941	A	C	0.0132639	0.0062998	0.527837	0.513	0.4701	1e-08
	8	116645056	rs2737226	C	T	0.0172124	0.0259026	0.607741	0.615	0.00371604	4.3e-13
	20	47543634	rs35393280	C	A	0.0217001	0.024098	0.246454	0.245	0.01629	6.3e-16
	3	35780735	rs35497369	C	T	-0.0159154	-0.0136958	0.283206	0.282	0.1539	7.2e-10
	3	81698481	rs3772912	G	A	-0.016537	0.00369682	0.362794	0.368	0.679301	6.4e-12
	17	66019926	rs62086906	C	T	0.0157891	0.00780034	0.210148	0.219	0.4726	2.8e-08
	1	72819888	rs74967575	A	T	-0.0191423	0.00609856	0.176304	0.18	0.5905	3e-10
	7	102053414	rs7797435	A	C	-0.0129478	-0.0231011	0.518175	0.517	0.00757304	2.3e-08
Able to confide-more restless	1	93639596	rs12044657	C	T	0.0144417	-0.00159141	0.650321	0.652672	0.247597	2.5e-09
	18	63486229	rs12326476	C	T	0.0161769	0.00321284	0.277914	0.283621	0.0277115	4.09996e-10
	5	30831387	rs1392446	T	C	-0.0129809	0.000211306	0.552163	0.551622	0.873356	2.59998e-08
	5	26913774	rs17563464	A	C	-0.0156366	-0.000601071	0.223308	0.222954	0.7074	3.09999e-08
	19	30951753	rs17614190	T	C	0.0294542	-0.0010612	0.064948	0.0640873	0.69466	5.19996e-10
	6	98297832	rs1933720	C	T	0.018566	-0.00257662	0.366054	0.37078	0.0597145	1.69981e-14
	8	65254903	rs2008156	C	T	-0.0193147	0.00169007	0.192329	0.191453	0.310875	5.10035e-11
	5	164618886	rs2052511	T	C	-0.0132005	0.00135676	0.622169	0.624813	0.319451	3.50002e-08
	13	60484175	rs2151502	A	G	-0.0162431	0.00284887	0.749095	0.745998	0.0595607	1.29999e-09
	5	106450985	rs2410941	A	C	0.0132639	0.000279069	0.527837	0.530704	0.832335	1e-08
	8	116639474	rs2737226	C	T	0.0172124	-0.00157653	0.607741	0.604878	0.24134	4.30031e-13
	3	117675543	rs2925313	T	G	-0.0129548	-0.00131209	0.599761	0.595036	0.328048	4.49997e-08
	20	47543634	rs35393280	C	A	0.0217001	0.0017072	0.246454	0.249402	0.259843	6.29941e-16
	3	35780735	rs35497369	C	T	-0.0159154	0.00259149	0.283206	0.281027	0.0776033	7.19996e-10
	3	81698481	rs3772912	G	A	-0.016537	-0.000333963	0.362794	0.36316	0.806611	6.4003e-12
	17	66019926	rs62086906	C	T	0.0157891	0.000503776	0.210148	0.208004	0.755832	2.80001e-08
	1	72819888	rs74967575	A	T	-0.0191423	0.0013444	0.176304	0.175933	0.435882	2.99999e-10
	1	98330439	rs76586805	C	T	-0.0213854	0.00200929	0.100567	0.0992154	0.361334	2.80001e-08
	7	102053414	rs7797435	A	C	-0.0129478	-0.000594927	0.518175	0.517645	0.651078	2.30001e-08
	1	159169641	rs862999	C	T	-0.0162108	-0.00162322	0.73423	0.732457	0.278064	8.79995e-10
Able to confide-easily distracted	1	93639596	rs12044657	C	T	0.0144417	-0.00140017	0.650321	0.652672	0.234412	2.5e-09
	18	63486229	rs12326476	C	T	0.0161769	0.00266323	0.277914	0.283621	0.0329276	4.09996e-10
	5	30831387	rs1392446	T	C	-0.0129809	0.000211101	0.552163	0.551622	0.852336	2.59998e-08
	5	26913774	rs17563464	A	C	-0.0156366	-0.000570459	0.223308	0.222954	0.677117	3.09999e-08
	19	30951753	rs17614190	T	C	0.0294542	-0.00477394	0.064948	0.0640873	0.0390023	5.19996e-10
	6	98297832	rs1933720	C	T	0.018566	-0.000903052	0.366054	0.37078	0.440489	1.69981e-14
	5	164618886	rs2052511	T	C	-0.0132005	0.000733087	0.622169	0.624813	0.529484	3.50002e-08
	13	60484175	rs2151502	A	G	-0.0162431	0.0012958	0.749095	0.745998	0.316503	1.29999e-09
	5	106450985	rs2410941	A	C	0.0132639	-4.18907e-05	0.527837	0.530704	0.970368	1e-08
	8	116639474	rs2737226	C	T	0.0172124	-0.000568301	0.607741	0.604878	0.621531	4.30031e-13
	3	117675543	rs2925313	T	G	-0.0129548	-0.00235608	0.599761	0.595036	0.040083	4.49997e-08
	20	47543634	rs35393280	C	A	0.0217001	0.00073179	0.246454	0.249402	0.572374	6.29941e-16
	3	35780735	rs35497369	C	T	-0.0159154	-0.00151251	0.283206	0.281027	0.22861	7.19996e-10
	3	81698481	rs3772912	G	A	-0.016537	0.000558021	0.362794	0.36316	0.632562	6.4003e-12
	17	66019926	rs62086906	C	T	0.0157891	0.000625109	0.210148	0.208004	0.651974	2.80001e-08
	1	72819888	rs74967575	A	T	-0.0191423	0.00277593	0.176304	0.175933	0.0600316	2.99999e-10
	1	98330439	rs76586805	C	T	-0.0213854	-0.000510452	0.100567	0.0992154	0.786339	2.80001e-08
	7	102053414	rs7797435	A	C	-0.0129478	0.00162235	0.518175	0.517645	0.149409	2.30001e-08
	1	159169641	rs862999	C	T	-0.0162108	-0.000984039	0.73423	0.732457	0.442119	8.79995e-10
Able to confide-more active	1	93639596	rs12044657	C	T	0.0144417	0.000543177	0.650321	0.652672	0.5681	2.5e-09
	18	63486229	rs12326476	C	T	0.0161769	0.00092325	0.277914	0.283621	0.360164	4.09996e-10
	5	30831387	rs1392446	T	C	-0.0129809	-4.11829e-06	0.552163	0.551622	0.996414	2.59998e-08
	5	26913774	rs17563464	A	C	-0.0156366	-0.00118316	0.223308	0.222954	0.285172	3.09999e-08
	19	30951753	rs17614190	T	C	0.0294542	-5.3277e-06	0.064948	0.0640873	0.997725	5.19996e-10
	6	98297832	rs1933720	C	T	0.018566	-0.000863925	0.366054	0.37078	0.361121	1.69981e-14
	8	65254903	rs2008156	C	T	-0.0193147	0.00214554	0.192329	0.191453	0.0627466	5.10035e-11
	5	164618886	rs2052511	T	C	-0.0132005	0.000642083	0.622169	0.624813	0.495522	3.50002e-08
	13	60484175	rs2151502	A	G	-0.0162431	0.002008	0.749095	0.745998	0.0547407	1.29999e-09
	5	106450985	rs2410941	A	C	0.0132639	0.00128083	0.527837	0.530704	0.159854	1e-08
	8	116639474	rs2737226	C	T	0.0172124	0.000451805	0.607741	0.604878	0.627175	4.30031e-13
	3	117675543	rs2925313	T	G	-0.0129548	-0.00165136	0.599761	0.595036	0.0749722	4.49997e-08
	20	47543634	rs35393280	C	A	0.0217001	0.00132914	0.246454	0.249402	0.204451	6.29941e-16
	3	35780735	rs35497369	C	T	-0.0159154	0.00111161	0.283206	0.281027	0.273511	7.19996e-10
	3	81698481	rs3772912	G	A	-0.016537	-0.000671199	0.362794	0.36316	0.47665	6.4003e-12
	17	66019926	rs62086906	C	T	0.0157891	0.00180193	0.210148	0.208004	0.10763	2.80001e-08
	1	72819888	rs74967575	A	T	-0.0191423	0.00124468	0.176304	0.175933	0.296718	2.99999e-10
	1	98330439	rs76586805	C	T	-0.0213854	-7.31037e-05	0.100567	0.0992154	0.961683	2.80001e-08
	7	102053414	rs7797435	A	C	-0.0129478	0.000428872	0.518175	0.517645	0.6372	2.30001e-08
	1	159169641	rs862999	C	T	-0.0162108	0.000627018	0.73423	0.732457	0.544458	8.79995e-10
Able to confide-Anxiety disorders	1	93639596	rs12044657	C	T	0.0144417	0.0089	0.650321	0.6689	0.4848	2.5e-09
	5	26913774	rs17563464	A	C	-0.0156366	-0.0065	0.223308	0.1445	0.7104	3.09999e-08
	19	30951753	rs17614190	T	C	0.0294542	-0.0119	0.064948	0.05037	0.6691	5.19996e-10
	6	98297832	rs1933720	C	T	0.018566	-0.0065	0.366054	0.3451	0.608199	1.69981e-14
	8	65254903	rs2008156	C	T	-0.0193147	-0.0343	0.192329	0.1828	0.0291099	5.10035e-11
	5	164618886	rs2052511	T	C	-0.0132005	0.0105	0.622169	0.6631	0.4127	3.50002e-08
	13	60484175	rs2151502	A	G	-0.0162431	0.0098	0.749095	0.7992	0.5144	1.29999e-09
	5	106450985	rs2410941	A	C	0.0132639	-0.0201	0.527837	0.5158	0.0961789	1e-08
	8	116639474	rs2737226	C	T	0.0172124	-0.0064	0.607741	0.7058	0.6327	4.30031e-13
	3	117675543	rs2925313	T	G	-0.0129548	0.0158	0.599761	0.5867	0.1982	4.49997e-08
	20	47543634	rs35393280	C	A	0.0217001	0.0062	0.246454	0.224	0.664899	6.29941e-16
	3	81698481	rs3772912	G	A	-0.016537	0.0094	0.362794	0.4555	0.4372	6.4003e-12
	1	72819888	rs74967575	A	T	-0.0191423	-0.0221	0.176304	0.1973	0.1459	2.99999e-10
	1	98330439	rs76586805	C	T	-0.0213854	0.022	0.100567	0.1447	0.198	2.80001e-08
	7	102053414	rs7797435	A	C	-0.0129478	0.0028	0.518175	0.4693	0.8191	2.30001e-08
	1	159169641	rs862999	C	T	-0.0162108	0.0035	0.73423	0.7501	0.7995	8.79995e-10
Able to confide-Seen doctor for nerves/anxiety/tension/depression	1	93639596	rs12044657	C	T	0.0144417	-0.000891661	0.650321	0.650281	0.38	2.5e-09
	18	63486229	rs12326476	C	T	0.0161769	0.000791669	0.277914	0.277887	0.47	4.09996e-10
	5	26913774	rs17563464	A	C	-0.0156366	-0.00264544	0.223308	0.223345	0.0259998	3.09999e-08
	19	30951753	rs17614190	T	C	0.0294542	-0.00329368	0.064948	0.065014	0.0990011	5.19996e-10
	6	98297832	rs1933720	C	T	0.018566	-0.000360706	0.366054	0.366005	0.719999	1.69981e-14
	8	65254903	rs2008156	C	T	-0.0193147	0.00211422	0.192329	0.192353	0.0879995	5.10035e-11
	13	60484175	rs2151502	A	G	-0.0162431	0.00226433	0.749095	0.749209	0.0449997	1.29999e-09
	5	106450985	rs2410941	A	C	0.0132639	0.000280284	0.527837	0.527863	0.77	1e-08
	3	35780735	rs35497369	C	T	-0.0159154	0.00134044	0.283206	0.283128	0.22	7.19996e-10
	3	81698481	rs3772912	G	A	-0.016537	-0.000623115	0.362794	0.362873	0.54	6.4003e-12
	17	66019926	rs62086906	C	T	0.0157891	-0.000405877	0.210148	0.210125	0.73	2.80001e-08
	7	102053414	rs7797435	A	C	-0.0129478	0.000302849	0.518175	0.518198	0.760001	2.30001e-08
	1	159169641	rs862999	C	T	-0.0162108	0.000237668	0.73423	0.73427	0.83	8.79995e-10
Able to confide-Seen a psychiatrist for nerves/anxiety/tension/depression	1	93639596	rs12044657	C	T	0.0144417	0.000414746	0.650321	0.65034	0.55	2.5e-09
	18	63486229	rs12326476	C	T	0.0161769	0.000879708	0.277914	0.277921	0.24	4.09996e-10
	5	26913774	rs17563464	A	C	-0.0156366	-0.000719517	0.223308	0.223288	0.38	3.09999e-08
	19	30951753	rs17614190	T	C	0.0294542	-0.00191028	0.064948	0.065019	0.16	5.19996e-10
	6	98297832	rs1933720	C	T	0.018566	0.00022385	0.366054	0.366046	0.75	1.69981e-14
	8	65254903	rs2008156	C	T	-0.0193147	0.000229374	0.192329	0.192315	0.79	5.10035e-11
	5	106450985	rs2410941	A	C	0.0132639	-0.000576921	0.527837	0.527835	0.39	1e-08
	3	117675543	rs2925313	T	G	-0.0129548	-0.000731131	0.599761	0.59973	0.28	4.49997e-08
	20	47543634	rs35393280	C	A	0.0217001	0.00139095	0.246454	0.246398	0.0719996	6.29941e-16
	3	35780735	rs35497369	C	T	-0.0159154	0.000158697	0.283206	0.283165	0.83	7.19996e-10
	3	81698481	rs3772912	G	A	-0.016537	0.000183831	0.362794	0.362803	0.79	6.4003e-12
	17	66019926	rs62086906	C	T	0.0157891	0.00113925	0.210148	0.210131	0.16	2.80001e-08
	1	98330439	rs76586805	C	T	-0.0213854	-0.000658993	0.100567	0.100572	0.55	2.80001e-08
	7	102053414	rs7797435	A	C	-0.0129478	-0.000167212	0.518175	0.518162	0.8	2.30001e-08
	1	159169641	rs862999	C	T	-0.0162108	0.000877219	0.73423	0.734275	0.25	8.79995e-10
Able to confide-Cognitive performance	1	93639596	rs12044657	C	T	0.0144417	0.0063867	0.650321	NA	0.0277102	2.5e-09
	5	30831387	rs1392446	T	C	-0.0129809	-0.00798431	0.552163	NA	0.00352801	2.59998e-08
	8	65254903	rs2008156	C	T	-0.0193147	-0.00248325	0.192329	NA	0.4814	5.10035e-11
	5	164618886	rs2052511	T	C	-0.0132005	0.00310235	0.622169	NA	0.2716	3.50002e-08
	13	60484175	rs2151502	A	G	-0.0162431	-0.00549807	0.749095	NA	0.0832109	1.29999e-09
	8	116639474	rs2737226	C	T	0.0172124	-0.000635946	0.607741	NA	0.8256	4.30031e-13
	3	35780735	rs35497369	C	T	-0.0159154	0.00314532	0.283206	NA	0.3215	7.19996e-10
	3	81698481	rs3772912	G	A	-0.016537	-0.00268236	0.362794	NA	0.3394	6.4003e-12
	17	66019926	rs62086906	C	T	0.0157891	-0.00266265	0.210148	NA	0.421	2.80001e-08
	7	102053414	rs7797435	A	C	-0.0129478	-0.00196019	0.518175	NA	0.4741	2.30001e-08
	1	159169641	rs862999	C	T	-0.0162108	-5.72974e-05	0.73423	NA	0.9854	8.79995e-10
Able to confide-Cognitive function	1	93639596	rs12044657	C	T	0.0144417	0.0043	0.650321	0.6531	0.152	2.5e-09
	8	65254903	rs2008156	C	T	-0.0193147	-0.00202	0.192329	0.1973	0.577	5.10035e-11
	5	164618886	rs2052511	T	C	-0.0132005	0.00494	0.622169	0.619	0.0929009	3.50002e-08
	13	60484175	rs2151502	A	G	-0.0162431	-0.00528	0.749095	0.7466	0.107	1.29999e-09
	8	116639474	rs2737226	C	T	0.0172124	-0.00301	0.607741	0.6122	0.306	4.30031e-13
	3	117675543	rs2925313	T	G	-0.0129548	-0.00588	0.599761	0.6276	0.0431996	4.49997e-08
	3	35780735	rs35497369	C	T	-0.0159154	0.00224	0.283206	0.2789	0.48	7.19996e-10
	3	81698481	rs3772912	G	A	-0.016537	-0.00224	0.362794	0.352	0.451	6.4003e-12
	17	66019926	rs62086906	C	T	0.0157891	-0.00374	0.210148	0.2228	0.289	2.80001e-08
	7	102053414	rs7797435	A	C	-0.0129478	-0.00151	0.518175	0.551	0.598	2.30001e-08
	1	159169641	rs862999	C	T	-0.0162108	0.00058	0.73423	0.7364	0.858	8.79995e-10
Able to confide-Fewer leisure/social activities	1	93639596	rs12044657	C	T	0.0144417	8.36151e-05	0.650321	0.650333	0.93	2.5e-09
	18	63486229	rs12326476	C	T	0.0161769	0.00284802	0.277914	0.277921	0.00769999	4.09996e-10
	5	30831387	rs1392446	T	C	-0.0129809	0.00131091	0.552163	0.552211	0.17	2.59998e-08
	5	26913774	rs17563464	A	C	-0.0156366	0.00111147	0.223308	0.22334	0.34	3.09999e-08
	19	30951753	rs17614190	T	C	0.0294542	0.00288994	0.064948	0.065012	0.14	5.19996e-10
	8	65254903	rs2008156	C	T	-0.0193147	-0.000400511	0.192329	0.192307	0.74	5.10035e-11
	5	164618886	rs2052511	T	C	-0.0132005	-0.002064	0.622169	0.622087	0.0369999	3.50002e-08
	13	60484175	rs2151502	A	G	-0.0162431	-0.00249885	0.749095	0.749239	0.0239999	1.29999e-09
	5	106450985	rs2410941	A	C	0.0132639	0.00126336	0.527837	0.527892	0.19	1e-08
	8	116639474	rs2737226	C	T	0.0172124	0.00249085	0.607741	0.607773	0.0109999	4.30031e-13
	20	47543634	rs35393280	C	A	0.0217001	0.000716217	0.246454	0.246436	0.52	6.29941e-16
	3	35780735	rs35497369	C	T	-0.0159154	-0.000596634	0.283206	0.283177	0.58	7.19996e-10
	3	81698481	rs3772912	G	A	-0.016537	-0.00297762	0.362794	0.362841	0.00280001	6.4003e-12
	17	66019926	rs62086906	C	T	0.0157891	0.000839114	0.210148	0.210128	0.48	2.80001e-08
	1	72819888	rs74967575	A	T	-0.0191423	0.000695762	0.176304	0.176345	0.58	2.99999e-10
	1	98330439	rs76586805	C	T	-0.0213854	-0.00112204	0.100567	0.10058	0.48	2.80001e-08
	7	102053414	rs7797435	A	C	-0.0129478	0.000359044	0.518175	0.518207	0.709999	2.30001e-08
	1	159169641	rs862999	C	T	-0.0162108	-0.00206365	0.73423	0.734252	0.0589997	8.79995e-10
Able to confide-Social anxiety/phobia	1	93639596	rs12044657	C	T	0.0144417	0.000458161	0.650321	0.652877	0.339065	2.5e-09
	18	63486229	rs12326476	C	T	0.0161769	-0.000189869	0.277914	0.283748	0.708605	4.09996e-10
	5	30831387	rs1392446	T	C	-0.0129809	0.00103545	0.552163	0.551833	0.0248433	2.59998e-08
	5	26913774	rs17563464	A	C	-0.0156366	0.000603149	0.223308	0.223059	0.279037	3.09999e-08
	19	30951753	rs17614190	T	C	0.0294542	0.00128037	0.064948	0.0642446	0.17333	5.19996e-10
	6	98297832	rs1933720	C	T	0.018566	-0.000140992	0.366054	0.370908	0.767326	1.69981e-14
	8	65254903	rs2008156	C	T	-0.0193147	0.000529472	0.192329	0.191442	0.361871	5.10035e-11
	5	164618886	rs2052511	T	C	-0.0132005	0.000620825	0.622169	0.624495	0.190626	3.50002e-08
	13	60484175	rs2151502	A	G	-0.0162431	0.000465274	0.749095	0.746149	0.376662	1.29999e-09
	5	106450985	rs2410941	A	C	0.0132639	0.000301513	0.527837	0.530632	0.511088	1e-08
	8	116639474	rs2737226	C	T	0.0172124	-9.11284e-05	0.607741	0.604869	0.845789	4.30031e-13
	3	117675543	rs2925313	T	G	-0.0129548	-0.000609444	0.599761	0.595443	0.191865	4.49997e-08
	20	47543634	rs35393280	C	A	0.0217001	-0.000830912	0.246454	0.249555	0.115201	6.29941e-16
	3	35780735	rs35497369	C	T	-0.0159154	-0.000633557	0.283206	0.280855	0.215472	7.19996e-10
	3	81698481	rs3772912	G	A	-0.016537	9.61554e-06	0.362794	0.363274	0.983847	6.4003e-12
	17	66019926	rs62086906	C	T	0.0157891	0.000873263	0.210148	0.208532	0.121333	2.80001e-08
	1	72819888	rs74967575	A	T	-0.0191423	0.000297574	0.176304	0.175856	0.620393	2.99999e-10
	1	98330439	rs76586805	C	T	-0.0213854	-0.00028147	0.100567	0.0994758	0.713034	2.80001e-08
	7	102053414	rs7797435	A	C	-0.0129478	-0.000219134	0.518175	0.517013	0.632304	2.30001e-08
	1	159169641	rs862999	C	T	-0.0162108	-0.000413181	0.73423	0.732211	0.427406	8.79995e-10
Chr, chromosome; EAF, Effect allele frequency; Pos, position; SE, standard error; SNP, single nucleotide polymorphism.

## Sheet: table S7
Table7. Characteristics of selected SNPs in Brain Rims1 expression on SCZ risk
Trait pair	chr	pos	SNP	effect_allele	other_allele	beta.exposure	beta.outcome	eaf.exposure	eaf.outcome	pval.outcome	pval.exposure
BrainMeta v2-SCZ (ieu-b-42)	6	72319079	rs12211666	T	G	-0.141764	0.019597	0.251366	0.24	0.129	1.62e-05
	6	72413544	rs12526311	T	C	-0.276366	0.0161	0.0382514	0.069	0.5119	1.19e-05
	6	72293746	rs12528750	G	A	-0.202464	0.015703	0.489071	0.516	0.1507	5.96e-13
	6	72408820	rs4415130	C	T	-0.178451	0.008496	0.489071	0.499	0.4319	1.49e-10
	6	72334498	rs4498304	C	T	0.153877	0	0.248634	0.205	0.9973	7.84e-06
BrainMeta v2-SCZ (ieu-b-5102)	6	72319079	rs12211666	T	G	-0.141764	0.017604	0.251366	0.222	0.0887401	1.62e-05
	6	72413544	rs12526311	T	C	-0.276366	0.00969686	0.0382514	0.053	0.6173	1.19e-05
	6	72293746	rs12528750	G	A	-0.202464	0.0239021	0.489071	0.527	0.00553503	5.96e-13
	6	72408820	rs4415130	C	T	-0.178451	0.0133011	0.489071	0.505	0.122	1.49e-10
	6	72334498	rs4498304	C	T	0.153877	0.0113036	0.248634	0.204	0.3017	7.84e-06
PsychENCODE-SCZ (ieu-b-42)
	6	72647508	rs1111356	T	G	-0.0563219	0.027104	0.8628	0.846	0.0253099	1.91e-05
	6	72315646	rs11751413	G	A	0.0550553	-0.0183997	0.4583	0.456	0.0335699	2.14e-09
	6	72880387	rs2496494	T	C	0.0612296	-0.0416025	0.1143	0.118	0.002357	6.08e-05
	6	72695839	rs75333662	A	G	-0.0580661	0.00480151	0.1093	0.131	0.7074	6.01e-05
	6	72646851	rs9350445	C	A	-0.0453276	0.0103029	0.6292	0.604	0.2491	1.26e-06
PsychENCODE-SCZ (ieu-b-5102)
	6	72647508	rs1111356	T	G	-0.0563219	0.027104	0.8628	0.846	0.0253099	1.91e-05
	6	72315646	rs11751413	G	A	0.0550553	-0.0183997	0.4583	0.456	0.0335699	2.14e-09
	6	72880387	rs2496494	T	C	0.0612296	-0.0416025	0.1143	0.118	0.002357	6.08e-05
	6	72695839	rs75333662	A	G	-0.0580661	0.00480151	0.1093	0.131	0.7074	6.01e-05
	6	72646851	rs9350445	C	A	-0.0453276	0.0103029	0.6292	0.604	0.2491	1.26e-06
PsychENCODE-SCZ SCZ (finn-b-F5_SCHZPHR)	6	72647508	rs1111356	T	G	-0.0563219	0.0552	0.8628	0.8873	0.2678	1.91e-05
	6	72315646	rs11751413	G	A	0.0550553	-0.0322	0.4583	0.4795	0.3033	2.14e-09
	6	72880387	rs2496494	T	C	0.0612296	-0.1054	0.1143	0.07215	0.0843393	6.08e-05
	6	72646851	rs9350445	C	A	-0.0453276	0.0619	0.6292	0.6301	0.0567597	1.26e-06
MetaBrain-SCZ (ieu-b-5102)
	6	72461651	rs111964429	A	C	-0.187954	-0.00019998	0.160172	0.159	0.9837	1.32e-06
	6	72303001	rs11756168	G	A	0.179142	-0.0194987	0.447835	0.451	0.0242097	1.04e-09
	6	72453383	rs1328705	A	G	-0.123373	0.00569619	0.294613	0.3	0.5446	8.32e-05
	6	72199930	rs6453543	T	C	-0.114087	0.017197	0.432744	0.423	0.0480098	7.68e-05
	6	72412463	rs66666960	A	G	0.171787	-0.0103958	0.424804	0.423	0.2333	6.88e-09
	6	72254897	rs9342842	G	T	-0.124448	0.0122042	0.355765	0.344	0.1764	2.99e-05
	6	72595779	rs9358985	T	G	-0.174267	0.00409839	0.214432	0.212	0.7008	5.14e-07
	6	72342260	rs9446426	A	G	-0.183025	0.00750179	0.117761	0.117	0.5771	5.64e-05

## Sheet: FigureS1-21
Supplementary Figures（S1-S21）
Figure S1. The causal effect of LNL on SCZ risk. (A) Scatter plot, (B) Funnel plot, (C) Forest plot, and (D) Leave one out plot. LNL, isolation and loneliness; SCZ, schizophrenia.
Figure S2. The causal effect of LNL on SCZ risk. (A) Scatter plot, (B) Funnel plot, (C) Forest plot, and (D) Leave one out plot. LNL, isolation and loneliness; SCZ, schizophrenia
Figure S3. The causal effect of LNL on easily distracted. (A) Scatter plot, (B) Funnel plot, (C) Forest plot, and (D) Leave one out plot. LNL, isolation and loneliness
Figure S4. The causal effect of LNL on more active. (A) Scatter plot, (B) Funnel plot, (C) Forest plot, and (D) Leave one out plot. LNL, isolation and loneliness
Figure S5. The causal effect of LNL on more restless. (A) Scatter plot, (B) Funnel plot, (C) Forest plot, and (D) Leave one out plot. LNL, isolation and loneliness
Figure S6. The causal effect of LNL on Anxiety disorder. (A) Scatter plot, (B) Funnel plot, (C) Forest plot, and (D) Leave one out plot. LNL, isolation and loneliness.
Figure S7. The causal effect of LNL on Seen doctor for nerves/anxiety/tension/depression. (A) Scatter plot, (B) Funnel plot, (C) Forest plot, and (D) Leave one out plot. LNL, isolation and loneliness.
Figure S8. The causal effect of LNL on Seen phychiatist for nerves/anxiety/tension/depression. (A) Scatter plot, (B) Funnel plot, (C) Forest plot, and (D) Leave one out plot. LNL, isolation and loneliness.
Figure S9. The causal effect of LNL on fewer social activity. (A) Scatter plot, (B) Funnel plot, (C) Forest plot, and (D) Leave one out plot. LNL, isolation and loneliness.
Figure S10. The causal effect of Interval of family/friend visits on SCZ. (A) Scatter plot, (B) Funnel plot, (C) Forest plot, and (D) Leave one out plot.
Figure S11. The causal effect of Interval of family/friend visits on SCZ. (A) Scatter plot, (B) Funnel plot, (C) Forest plot, and (D) Leave one out plot.
Figure S12. The causal effect of Interval of family/friend visits on fewer social activity. (A) Scatter plot, (B) Funnel plot, (C) Forest plot, and (D) Leave one out plot.
Figure S13. The causal effect of Able to confideon SCZ. (A) Scatter plot, (B) Funnel plot, (C) Forest plot, and (D) Leave one out plot.
Figure S14. The causal effect of able to confideon SCZ. (A) Scatter plot, (B) Funnel plot, (C) Forest plot, and (D) Leave one out plot.
Figure S15. The causal effect of able to confide on more active. (A) Scatter plot, (B) Funnel plot, (C) Forest plot, and (D) Leave one out plot.
Figure S16. The causal effect of able to confide on more restless. (A) Scatter plot, (B) Funnel plot, (C) Forest plot, and (D) Leave one out plot.
Figure S17. The causal effect of able to confide on Anxiety disorder. (A) Scatter plot, (B) Funnel plot, (C) Forest plot, and (D) Leave one out plot.
Figure S18. The causal effect of able to confide on Seen doctor for nerves/anxiety/tension/depression. (A) Scatter plot, (B) Funnel plot, (C) Forest plot, and (D) Leave one out plot.
Figure S19. The causal effect of able to confide on Seen psychiatirst for nerves/anxiety/tension/depression. (A) Scatter plot, (B) Funnel plot, (C) Forest plot, and (D) Leave one out plot.
Figure S20. The causal effect of able to confide on cognitive function. (A) Scatter plot, (B) Funnel plot, (C) Forest plot, and (D) Leave one out plot.
Figure S21. The causal effect of able to confide on fewer social activity. (A) Scatter plot, (B) Funnel plot, (C) Forest plot, and (D) Leave one out plot.
